# Supplementary material
Source: PubMed Central journal article supplement (PMC8475740)

# Figure S1

## A. Allodynia: left paw

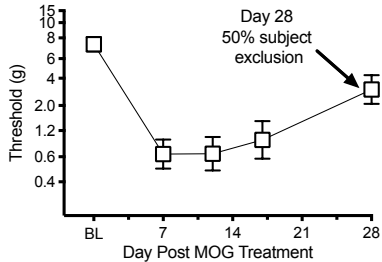

## B. Allodynia: right paw

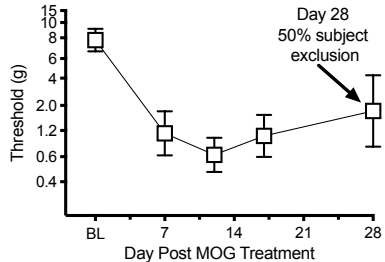

## C. Motor score

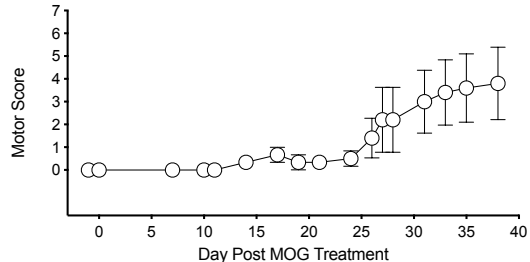

Supplement: NIHMS1661628-supplement-1.pdf [file NIHMS1661628-supplement-1.pdf]
